# Supplementary material for: Oxygen Vacancies in Bismuth Tantalum Oxide to Anchor Polysulfide and Accelerate the Sulfur Evolution Reaction in Lithium–Sulfur Batteries
Source: MDPI journal article supplement (doi:10.3390/nano12203551), 2022-10-11
Supplement: s1 [file s1]

# Oxygen Vacancies in Bismuth Tantalum Oxide to Anchor Polysulfide and Accelerate the Sulfur Evolution Reaction in Lithium–Sulfur Batteries

Chong Wang <sup>1,†</sup>, Jian-Hao Lu <sup>2,†</sup>, An-Bang Wang <sup>2</sup>, Hao Zhang <sup>2</sup>, Wei-Kun Wang <sup>2</sup>, Zhao-Qing Jin <sup>2,\*</sup> and Li-Zhen Fan <sup>1,\*</sup>

<sup>1</sup> Beijing Advanced Innovation Center for Materials Genome Engineering, Institute of Advanced Materials and Technology, University of Science and Technology Beijing, Beijing 100083, China

<sup>2</sup> Military Power Sources Research and Development Center, Research Institute of Chemical Defense, Beijing 100191, China

\* Correspondence: jinzhaoqing1001@gmail.com (Z.-Q.J.); fanlizhen@ustb.edu.cn (L.-Z.F.)

† These authors contributed equally to this work.

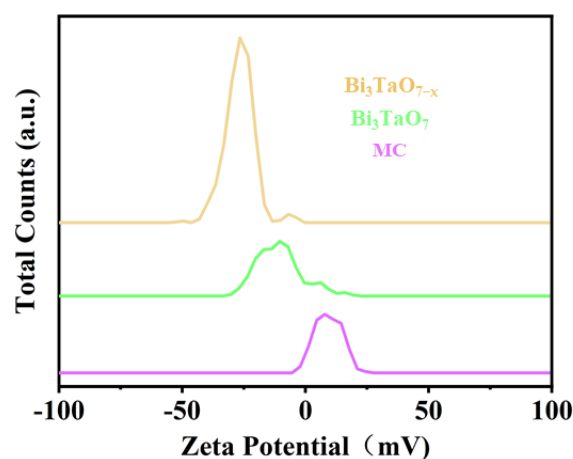

Figure S1. Zeta potentials of the dispersed three samples in water at pH value of 7.0.

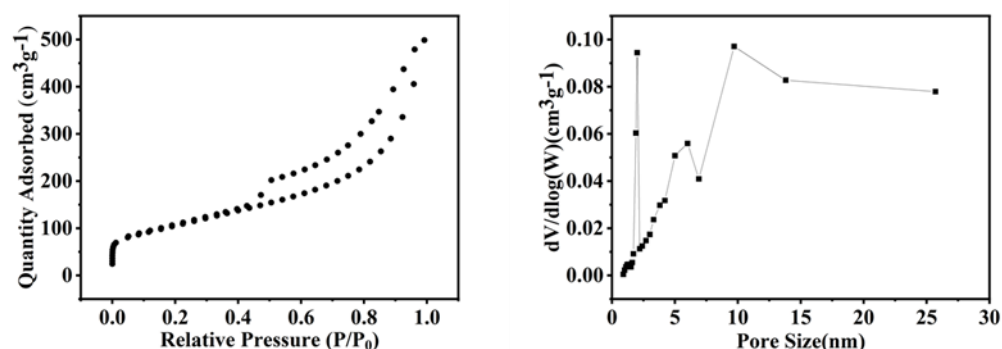

Figure S2. N<sub>2</sub> adsorption-desorption isotherm curves and the pore size distribution of Bi<sub>3</sub>TaO<sub>7-x</sub>.

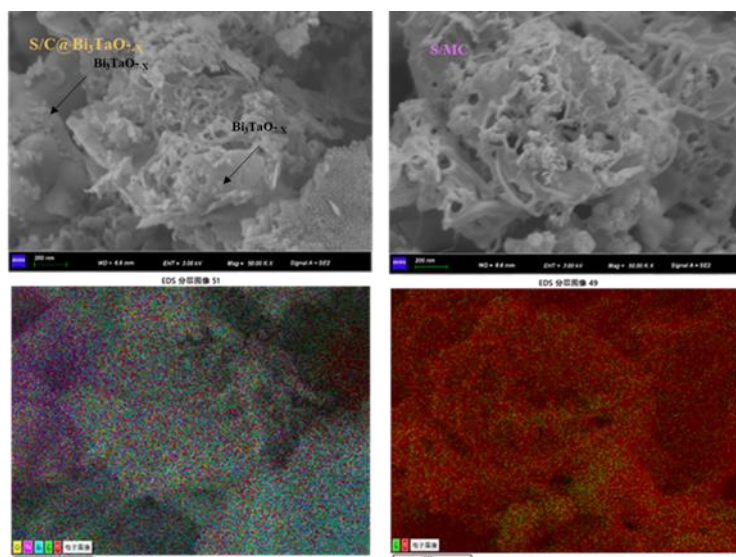

**Figure S3.** Characterization of SEM images and corresponding EDS elemental mappings of S/C and S/C@Bi<sub>3</sub>TaO<sub>7-x</sub>.

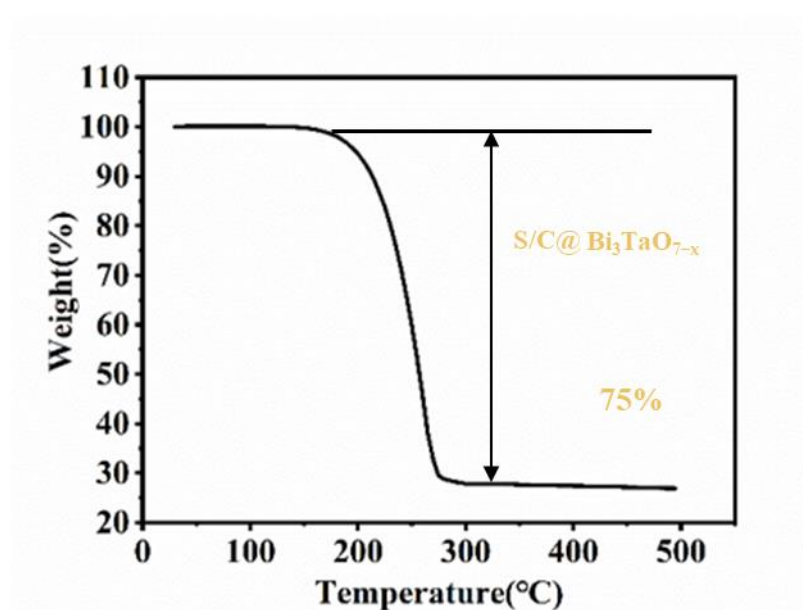

**Figure S4.** TGA curve of S/C@Bi<sub>3</sub>TaO<sub>7-x</sub>.

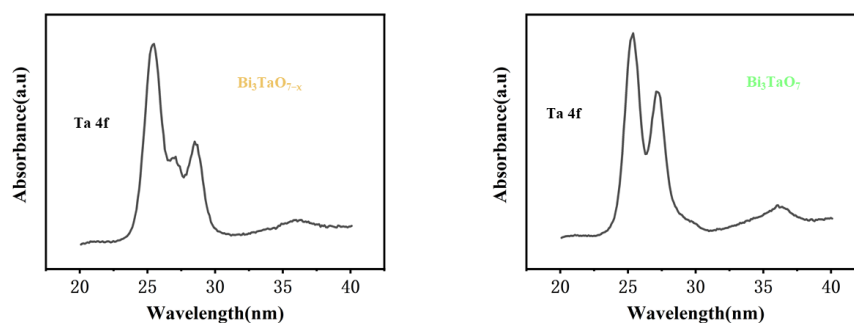

**Figure S5.** Ta 4f for Bi<sub>3</sub>TaO<sub>7</sub> and Bi<sub>3</sub>TaO<sub>7-x</sub>.

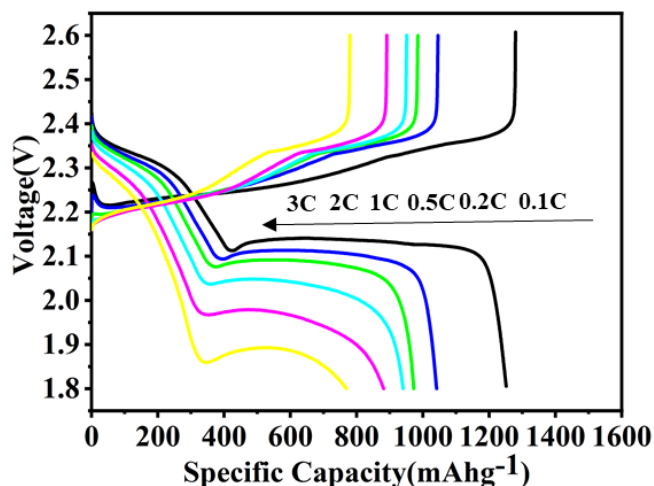

**Figure S6.** Multi-rate discharge-charge profiles of S/C@Bi<sub>3</sub>TaO<sub>7-x</sub>.

**Table S1.** The gravimetric energy is calculated based on all active and inactive components, including the packing film, current collectors, and separator.

| Parameters                            | Unit                  | Value |
|---------------------------------------|-----------------------|-------|
| Sulfur loading                        | %                     | 80    |
| Carbon content                        | %                     | 10    |
| Binder content                        | %                     | 10    |
| Electrolyte/sulfur ratio              | $\mu\text{L mg}^{-1}$ | 3.3   |
| Number of double-sided coated cathode |                       | 6     |
| Weight of tab                         | g                     | 0.28  |
| Weight of the sulfur                  | g                     | 2.82  |
| Weight of the packing plus pouch foil | g                     | 2.5   |
| Weight of the anode                   | g                     | 3.6   |
| Weight of the cathode                 | g                     | 4.70  |
| Weight of the separator               | g                     | 0.64  |
| Weight of electrolyte                 | g                     | 9.30  |
| Total weight                          | g                     | 21.02 |
| Energy of cell                        | Wh                    | 6.3   |
| Energy Density                        | Wh kg <sup>-1</sup>   | 299   |

**Table S2.** Comparative table of Li-S pouch cell performance with recently reported works.

| S loading<br>(mg cm <sup>-2</sup> ) | Energy density<br>(W h kg <sup>-1</sup> ) | E/S ratio<br>( $\mu\text{L mg}^{-1}$ ) | Areal<br>capacity<br>(mA h cm <sup>-2</sup> ) | Capacity retention rate<br>(%) | Cycle     | References        |
|-------------------------------------|-------------------------------------------|----------------------------------------|-----------------------------------------------|--------------------------------|-----------|-------------------|
| 4.0                                 | 206                                       | 6.0                                    | 4.8                                           | ~88                            | 40        | [1]               |
| 4.1                                 | 150                                       | 4.5                                    | 3.3                                           | 51                             | 66        | [2]               |
| 4.9                                 | 301                                       | 4.0                                    | 6.5                                           | 89                             | 30        | [3]               |
| 5.0                                 | 118                                       | 7.0                                    | 4.5                                           | ~77                            | 50        | [4]               |
| 6.0                                 | 317                                       | 4.0                                    | 7.2                                           | 74                             | 80        | [5]               |
| 6.1                                 | 301.4                                     | 3.0                                    | 7.1                                           | 81                             | 23        | [6]               |
| 6.5                                 | 299                                       | 2.5                                    | 5.9                                           | 83                             | 10        | [7]               |
| 13.6                                | 303                                       | 2.4                                    | 11.0                                          | 78                             | 30        | [8]               |
| <b>9.6</b>                          | <b>299.0</b>                              | <b>3.3</b>                             | <b>10.20</b>                                  | <b>54</b>                      | <b>53</b> | <b>This work*</b> |

## References

1. Zhao, M.; Chen, X.; Li, X. Y.; Li, B. Q.; Huang, J. Q. An organodiselenide comediator to facilitate sulfur redox kinetics in lithium–sulfur batteries. *Adv. Mater.* **2021**, *33*, 2007298.
2. He, J.; Bhargava, A.; Manthiram, A. High-Energy-Density, Long-Life Lithium–Sulfur Batteries with Practically Necessary Parameters Enabled by Low-Cost Fe–Ni Nanoalloy Catalysts. *ACS Nano* **2021**, *15*, 8583–8591.
3. Huang, Y.; Shaibani, M.; Gamot, T. D.; Wang, M.; Jovanović, P.; Cooray, D.; Majumder, M. A saccharide-based binder for efficient polysulfide regulations in Li-S batteries. *Nat. Commun.* **2021**, *12*, 1–15.
4. Luo, L.; Li, J.; Yaghoobnejad Asl, H.; Manthiram, A. In-situ assembled VS<sub>4</sub> as a polysulfide mediator for high-loading lithium–sulfur batteries. *ACS Energy Lett.* **2020**, *5*, 1177–1185.
5. Zhao, C.; Xu, G. L.; Yu, Z.; Zhang, L.; Hwang, I.; Mo, Y. X.; Zhao, T. A high-energy and long-cycling lithium–sulfur pouch cell via a macroporous catalytic cathode with double-end binding sites. *Nat. Nanotechnol.* **2021**, *16*, 166–173.
6. Zhang, X. Q.; Jin, Q.; Nan, Y. L.; Hou, L. P.; Li, B. Q.; Chen, X.; Zhang, Q. Electrolyte Structure of Lithium Polysulfides with Anti-Reductive Solvent Shells for Practical Lithium–Sulfur Batteries, *Angew. Chem. Int. Ed.* **2021**, *60*, 15503–15509.
7. Qi, C.; Li, Z.; Wang, G.; Yuan, H.; Chen, C.; Jin, J.; Wen, Z. Microregion Welding Strategy Prevents the Formation of Inactive Sulfur Species for High-Performance Li-S Battery, *Adv. Energy Mater.* **2021**, *11*, 2102024.
8. Wang, X.; Yang, Y.; Lai, C.; Li, R.; Xu, H.; Tan, D. H.; Loh, K. P. Dense-Stacking Porous Conjugated Polymer as Reactive-Type Host for High-Performance Lithium Sulfur Batteries, *Angew. Chem. Int. Ed.* **2021**, *60*, 11359–11369.
